# Supplementary material
Source: publisher site journal article supplement (https://www.dovepress.com/article/541613)

### Supplementary Table S1. Non-ocular AEs and SAEs

| <b>n (%)</b>       | <b>All patients<br/>N=144</b> |
|--------------------|-------------------------------|
| Non-ocular AE      | 28 (19.4)                     |
| Device-related AE  | 0                             |
| Surgery-related AE | 0                             |
| SAE                | 6 (4.2)                       |
| Most common AEs    |                               |
| COVID-19           | 3 (2.1)                       |
| Nasopharyngitis    | 3 (2.1)                       |
| Odontopathy        | 3 (2.1)                       |

AE, adverse event; SAE, serious adverse event.

**Supplementary Table S2. Severe visual disturbances reported preoperatively and at 6 and 12 months postoperative<sup>a</sup>**

| Visual disturbance, n (%) | Preoperative<br>(n=142) | Postoperative       |                      |
|---------------------------|-------------------------|---------------------|----------------------|
|                           |                         | 6 months<br>(n=135) | 12 months<br>(n=135) |
| Starbursts                | 14 (9.9)                | 13 (9.6)            | 21 (15.6)            |
| Halos                     | 12 (8.5)                | 9 (6.7)             | 6 (4.4)              |
| Glare                     | 8 (5.6)                 | 6 (4.4)             | 3 (2.3)              |
| Hazy vision               | 16 (11.3)               | 3 (2.2)             | 1 (0.7)              |
| Blurred vision            | 18 (12.8)               | 3 (2.2)             | 2 (1.5)              |
| Double vision             | 8 (5.7)                 | 0                   | 0                    |

<sup>a</sup>Data were reported from the Questionnaire for Visual Disturbances.

**Supplementary Table S3. Spectacle independence preoperatively and at 6 and 12 months postoperative in dim and bright conditions<sup>a</sup>**

| Distance            | Preoperative, n (%)<br>(n=140) | Postoperative              |                             |
|---------------------|--------------------------------|----------------------------|-----------------------------|
|                     |                                | 6 months, n (%)<br>(n=142) | 12 months, n (%)<br>(n=142) |
| Near, 40 cm         |                                |                            |                             |
| Overall             | 46 (32.9)                      | 116 (86.6)                 | 115 (86.5)                  |
| Bright conditions   | 48 (34.3)                      | 121 (90.3)                 | 117 (88.0)                  |
| Dim conditions      | 53 (37.9)                      | 117 (87.3)                 | 116 (87.2)                  |
| Intermediate, 80 cm |                                |                            |                             |
| Overall             | 53 (37.9)                      | 126 (94.0)                 | 120 (90.2)                  |
| Bright conditions   | 51 (36.4)                      | 126 (94.0)                 | 122 (91.7)                  |
| Dim conditions      | 52 (37.1)                      | 123 (91.8)                 | 121 (91.0)                  |
| Far, 5 m            |                                |                            |                             |
| Overall             | 66 (47.1)                      | 125 (93.3)                 | 125 (94.0)                  |
| Bright conditions   | 64 (45.7)                      | 128 (95.5)                 | 125 (94.0)                  |
| Dim conditions      | 62 (44.3)                      | 121 (90.3)                 | 121 (91.0)                  |

Data were reported from the Intraocular Lens Satisfaction Questionnaire.

<sup>a</sup>Proportion of patients answering “never” to the following: In the past 7 days, how often did you need to wear eyeglasses to see?

**Supplementary Figure S1.** Mean  $\pm$  SD monocular DCIVA (A), UIVA (B), DCNVA (C), and UNVA (D) after surgery. DCIVA, distance corrected intermediate visual acuity; DCNVA, distance corrected near visual acuity; logMAR, logarithm of the minimum angle of resolution; UIVA, uncorrected intermediate visual acuity; CNVA, uncorrected near visual acuity.

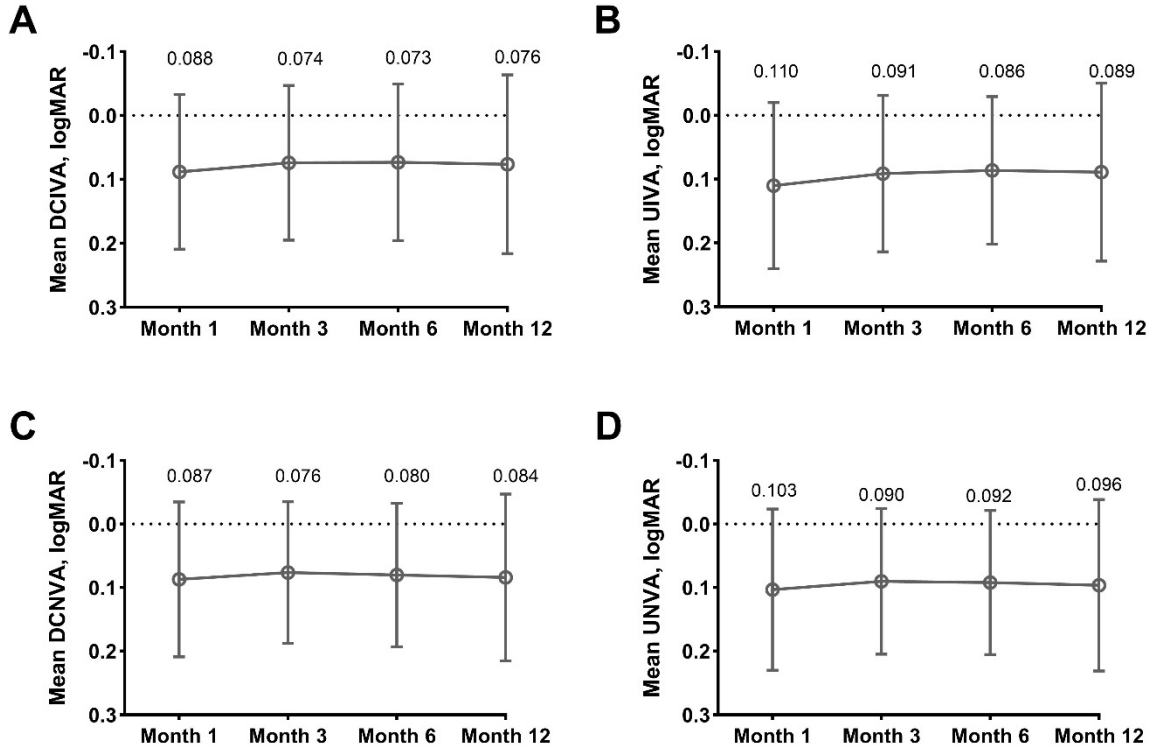

Supplement: Supplementary file 1 [file Supplementary%20Materials.pdf]
